# Supplementary material for: Structures of collagen IV globular domains: insight into associated pathologies, folding and network assembly
Source: PubMed Central journal article supplement (PMC6211539; doi:10.1107/s2052252518012459), 2018-10-10
Supplement: m-05-00765-sup1.pdf [file m-05-00765-sup1.pdf]

# IUCrJ

**Volume 5 (2018)**

**Supporting information for article:**

**Structures of collagen IV globular domains: insight into associated pathologies, folding and network assembly**

**Patricia Casino, Roberto Gozalbo-Rovira, Jesús Rodríguez-Díaz, Sreedatta Banerjee, Ariel Boutaud, Vicente Rubio, Billy G. Hudson, Juan Saus, Javier Cervera and Alberto Marina**

**Table S1** Primers used for  $\alpha$ NC1 amplification.

| Product                     | Primer name           | Primer sequences                                      |
|-----------------------------|-----------------------|-------------------------------------------------------|
| $\alpha$ 1(IV)NC1           | NCI1_Flag1/2_FWD      | GACAAGGGCCCCGATGGGTTGCCAGGATCCATGGGGCCC               |
|                             | NCI1_Flag_FWD         | GACTACAAGGACGACGATGACAAGGGCCCCGATGGGTTGCCAGGATCC      |
|                             | NCI1_REV              | TAGCTGAGTCAGGCTTCATTATGTTCT                           |
|                             | NCI1_KpnI_REV         | CCATGTTGGTACCTTAGCTGAGTCAGGCTTCATTATGTTCT             |
| $\alpha$ 2(IV)NC1           | NCI2_Flag1/2_FWD      | GACAAGGGCCGTCCAGGGAGCCCCGGCCTGCCGGGTATG               |
|                             | NCI2_Flag_FWD         | GACTACAAGGACGACGATGACAAGGGCCGTCCAGGGAGC               |
|                             | NCI2_REV              | TTCCTGGCACGCGCCGGCTCACAGTT                            |
|                             | NCI2_SacI_REV         | TTCCTGGCAGAGCTCGGCTCACAGTT                            |
| $\alpha$ 4(IV)NC1           | NCI4_Flag1/2_FWD      | GACAAGCTAGCTGGTCCCATTGGGGATCCTGGGCCAAA                |
|                             | NCI4_Flag_FWD         | GACTACAAGGACGACGATGACAAGCTAGCTGGTCCCATTGGGGATCCTGGGCC |
|                             | NCI4_REV              | GCCGAGGGCCCCTAGCTATACTTCACGCAG                        |
|                             | NCI4_KpnI_REV         | ATTGGTACCGCCGAGGGCCCCTAGCTA                           |
| $\alpha$ 5(IV)NC1           | NCI5_Flag1/2_FWD      | GACAAGGGTCCAGATGGATTGCAAGGTCCCCAGGTCCC                |
|                             | NCI5_Flag_FWD         | GACTACAAGGACGACGATGACAAGGGTCCAGATGGATTGCAAGGTCCC      |
|                             | NCI5_Flag_REV         | AAGGAATTCTTCAAATGTTATGTCCT                            |
|                             | NCI5_SacI_REV         | GGTGAGCTCAAGGAATTCTTCAAAAATG                          |
| Cloning<br>Bm40 and<br>Flag | Flag_SignalP1_FWD     | AGGGCTCTGGCAGCCCCACTAGCCGACTACAAGGACGACGATGACAAG      |
|                             | SignalP1_SignalP2_FWD | TTCTTTCTCCTTTGCCTGGCCGGGAGGGCTCTGGCAGCCCCACTAGCC      |
|                             | SignalP2_BamHI_FWD    | AGGGGGATCCATGAGGGCCTGGATCTTCTTCTCCTTTGCCTG            |
|                             | SignalP2_XhoI_FWD     | AGGGCTCGAGATGAGGGCCTGGATCTTCTTCTCCTTTGCCTG            |

**Table S2** Residue numbers for the structures of  $\alpha$ 1,  $\alpha$ 2,  $\alpha$ 3,  $\alpha$ 4 and  $\alpha$ 5 NC1 domains and their corresponding residue numbers according to the UniprotKB accession number.

| Collagen<br>$\alpha$ (IV) NC1<br>domain | Residue numbers in<br>each chain | Corresponding residue numbers in<br>the complete $\alpha$ (IV) chain |                   |
|-----------------------------------------|----------------------------------|----------------------------------------------------------------------|-------------------|
|                                         |                                  | UniprotKB<br>accession number                                        | Residue<br>number |
| $\alpha$ 1NC1                           | 1-229                            | P02462                                                               | 1441-1669         |
| $\alpha$ 2NC1                           | 1-228                            | P08572                                                               | 1485-1712         |
| $\alpha$ 3NC1                           | 1-230                            | Q01955                                                               | 1441-1671         |
| $\alpha$ 4NC1                           | 1-230                            | P53420                                                               | 1461-1690         |
| $\alpha$ 5NC1                           | 1-229                            | P29400                                                               | 1461-1685         |

**Table S3** Root mean square deviations (r.m.s.d.), in Å, for the superposition of the structures of NC1 hexamers.

The number of Ca atoms superimposed is indicated between parentheses.

| Rmsd (Å)                           | $\alpha 1\text{NC1}_{\text{homo}}$ | $\alpha 3\text{NC1}_{\text{homo}}$ | $\alpha 5\text{NC1}_{\text{homo}}$ | $\alpha 121\text{NC1}$ | $\alpha 121\text{NC1}(\text{PDB:1LI1})^*$ |
|------------------------------------|------------------------------------|------------------------------------|------------------------------------|------------------------|-------------------------------------------|
| $\alpha 1\text{NC1}_{\text{homo}}$ | -                                  | 0.62 (1342)                        | 0.55 (1356)                        | 0.59 (1335)            | 0.73 (1346)                               |
| $\alpha 3\text{NC1}_{\text{homo}}$ |                                    | -                                  | 0.67 (1344)                        | 0.72 (1327)            | 0.84 (1329)                               |
| $\alpha 5\text{NC1}_{\text{homo}}$ |                                    |                                    | -                                  | 0.67 (1338)            | 0.70 (1338)                               |
| $\alpha 121\text{NC1}$             |                                    |                                    |                                    | -                      | 0.48 (1348)                               |

\*Human  $\alpha 121\text{NC1}$  obtained from placenta, PDB file 1LI1.

**Table S4** Root mean square deviations (r.m.s.d.), in Å, for the superposition of the structures of the various recombinant NC1 chains crystallized here and the  $\alpha 1$ -2NC1 chains of human placenta.

The number of Ca atoms superimposed is indicated between parentheses.

| Rmsd (Å)                           | $\alpha 1\text{NC1}_{\alpha 121}$ | $\alpha 2\text{NC1}^*$ | $\alpha 2\text{NC1}_{\alpha 121}$ | $\alpha 2\text{NC1}_{\text{homo}}$ | $\alpha 3\text{NC1}_{\text{homo}}$ | $\alpha 4\text{NC1}_{\text{homo}}$ | $\alpha 5\text{NC1}_{\text{homo}}$ |
|------------------------------------|-----------------------------------|------------------------|-----------------------------------|------------------------------------|------------------------------------|------------------------------------|------------------------------------|
| $\alpha 1\text{NC1}^*$             | 0.35 (226)                        |                        |                                   |                                    | 0.65 (224)                         |                                    | 0.47 (226)                         |
| $\alpha 1\text{NC1}_{\alpha 121}$  | -                                 |                        | 0.75 (218)                        | 1.44 (166)                         | 0.53 (225)                         | 1.27 (178)                         | 0.41 (226)                         |
| $\alpha 2\text{NC1}^*$             |                                   | -                      | 0.45 (224)                        | 1.20 (169)                         |                                    | 1.27 (174)                         |                                    |
| $\alpha 2\text{NC1}_{\alpha 121}$  | 0.84 (219)                        | 0.45(224)              |                                   | 1.22 (168)                         | 0.88 (219)                         | 1.25 (175)                         | 0.79 (219)                         |
| $\alpha 1\text{NC1}_{\text{homo}}$ | 0.36 (226)                        |                        |                                   |                                    | 0.53(225)                          |                                    | 0.41 (226)                         |
| $\alpha 2\text{NC1}_{\text{homo}}$ |                                   | -                      | -                                 | -                                  | 1.45 (167)                         | 1.40 (164)                         | 1.46 (167)                         |
| $\alpha 3\text{NC1}_{\text{homo}}$ |                                   |                        |                                   |                                    | -                                  | 1.26 (179)                         | 0.58 (225)                         |
| $\alpha 4\text{NC1}_{\text{homo}}$ |                                   |                        |                                   |                                    |                                    | -                                  | 1.23 (178)                         |
| $\alpha 5\text{NC1}_{\text{homo}}$ |                                   |                        |                                   |                                    |                                    |                                    | -                                  |

\*From human placenta, PDB file 1LI1.

**Table S5** Missense mutations found in Alport's syndrome patients in  $\alpha$ 5NC1,  $\alpha$ 3NC1 and  $\alpha$ 4NC1.  $\alpha$ 5NC1 mutations have been extracted from The Alport syndrome COL4A5 variant database ([www.arup.utah.edu/database/ALPORT/ALPORT\\_welcome.php](http://www.arup.utah.edu/database/ALPORT/ALPORT_welcome.php)).

The mutations in chains  $\alpha$ 3NC1 and  $\alpha$ 4NC1 were reported in the publications given as footnotes to the Table.

| Protein Change            | Protein residue | $\alpha$ NC1  |
|---------------------------|-----------------|---------------|
| p.Cys1476Phe              | C20F            | $\alpha$ 5NC1 |
| p.Thr1480Arg              | T24R            | $\alpha$ 5NC1 |
| p.Gly1486Ala              | G30A            | $\alpha$ 5NC1 |
| p.Ser1488Phe              | S32F            | $\alpha$ 5NC1 |
| p.Ala1498Asp              | A42D            | $\alpha$ 5NC1 |
| p.Arg1511His              | R55H            | $\alpha$ 5NC1 |
| p.Pro1517Thr              | P61T            | $\alpha$ 5NC1 |
| p.Trp1538Ser              | W82S            | $\alpha$ 5NC1 |
| p.Pro1559Ala              | P103A           | $\alpha$ 5NC1 |
| p.Arg1563Gln              | R107Q           | $\alpha$ 5NC1 |
| p.Cys1564Arg              | C108R           | $\alpha$ 5NC1 |
| p.Cys1564Ser              | C108S           | $\alpha$ 5NC1 |
| p.Cys1567Arg              | C111R           | $\alpha$ 5NC1 |
| p.Cys1567Ser              | C111R           | $\alpha$ 5NC1 |
| p.Glu1568Gln              | E112Q           | $\alpha$ 5NC1 |
| p.Pro1584Leu              | P128L           | $\alpha$ 5NC1 |
| p.Cys1586Arg              | C130R           | $\alpha$ 5NC1 |
| p.Cys1586Phe              | C130F           | $\alpha$ 5NC1 |
| p.Gly1589Val              | G133V           | $\alpha$ 5NC1 |
| p.Trp1590Gly              | W134G           | $\alpha$ 5NC1 |
| p.Gly1596Asp              | G140D           | $\alpha$ 5NC1 |
| p.Tyr1597Cys              | Y141C           | $\alpha$ 5NC1 |
| p.Met1601Ile              | M145I           | $\alpha$ 5NC1 |
| p.Leu1621Ser              | L165S           | $\alpha$ 5NC1 |
| p.Cys1632Gly              | C176G           | $\alpha$ 5NC1 |
| p.Cys1632Trp              | C176W           | $\alpha$ 5NC1 |
| p.Cys1638Tyr              | C182Y           | $\alpha$ 5NC1 |
| p.Leu1649Arg              | L193R           | $\alpha$ 5NC1 |
| p.Ser1659Asn              | S203N           | $\alpha$ 5NC1 |
| p.Arg1677Gln              | R221Q           | $\alpha$ 5NC1 |
| p.Arg1677Pro              | R221P           | $\alpha$ 5NC1 |
| p.Arg1677Leu              | R221L           | $\alpha$ 5NC1 |
| p.Cys1678Arg              | C222R           | $\alpha$ 5NC1 |
| p.Cys1678Trp              | C222W           | $\alpha$ 5NC1 |
| p.Gln1679Pro              | Q223P           | $\alpha$ 5NC1 |
| p.Cys1681Phe              | C225F           | $\alpha$ 5NC1 |
| p.Gly1508Ser <sup>1</sup> | G48S            | $\alpha$ 4NC1 |
| p.Cys1513Thr <sup>1</sup> | C53T            | $\alpha$ 4NC1 |
| p.Cys1588Thr <sup>1</sup> | C128T           | $\alpha$ 4NC1 |
| p.Leu1474Pro <sup>2</sup> | L34P            | $\alpha$ 3NC1 |
| p.Leu1474Cys <sup>3</sup> | L34C            | $\alpha$ 3NC1 |

|                           |       |               |
|---------------------------|-------|---------------|
| p.Phe1475Ser <sup>4</sup> | F35S  | $\alpha$ 3NC1 |
| p.Cys1511Ile <sup>5</sup> | C71I  | $\alpha$ 3NC1 |
| p.Cys1548Tyr <sup>4</sup> | C108Y | $\alpha$ 3NC1 |
| p.Val1550Gly <sup>4</sup> | V110G | $\alpha$ 3NC1 |
| p.Trp1578Ser <sup>6</sup> | W138S | $\alpha$ 3NC1 |
| p.Qln1495Arg <sup>6</sup> | Q156R | $\alpha$ 3NC1 |

<sup>1</sup> Storey, H., Savige, J., Sivakumar, V., Abbs, S., Flinter, F. A. (2013). *J Am Soc Nephrol* 24,1945-1954

<sup>2</sup> Lemmink, H. H., Mochizuki, T., van den Heuvel, L. P., Schröder, C. H., Barrientos, A., Monnens, L. A., van Oost, B. A., Brunner, H. G., Reeders, S. T., Smeets, H. J. (1994). *Hum Mol Genet* 3,1269-1273.

<sup>3</sup> Mochizuki, T., Lemmink, H. H., Mariyama, M., Antignac, C., Gubler, M. C., Pirson, Y., Verellen-Dumoulin, C., Chan, B., Schröder, C. H., Smeets, H. J., Reeders, S. T. (1994). *Nat Genet* 8,77-81.

<sup>4</sup> Tazón Vega, B., Badenas, C., Ars, E., Lens, X., Milà, M., Darnell, A., Torra, R. (2003). *Am J Kidney Dis* 42, 952-959.

<sup>5</sup> Heidet, L., Arrondel, C., Forestier, L., Cohen-Solal, L., Mollet, G., Gutierrez, B., Stavrou, C., Gubler, M. C., Antignac, C. (2001). *J Am Soc Nephrol* 12, 97-106.

<sup>6</sup> Voskarides, K., Damianou, L., Neocleous, V., Zouvani, I., Christodoulidou, S., Hadjiconstantinou, V., Ioannou, K., Athanasiou, Y., Patsias, C., Alexopoulos, E., Pierides, A., Kyriacou, K., Deltas, C. (2007). *J Am Soc Nephrol* 18, 3004-3016

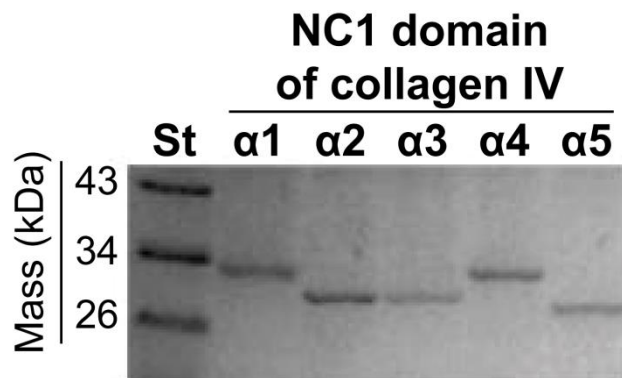

**Figure S1** Purified human  $\alpha$ 1-5NC1 domains produced by recombinant techniques. Coomassie-stained SDS-PAGE (12% polyacrylamide gel). St, protein standards

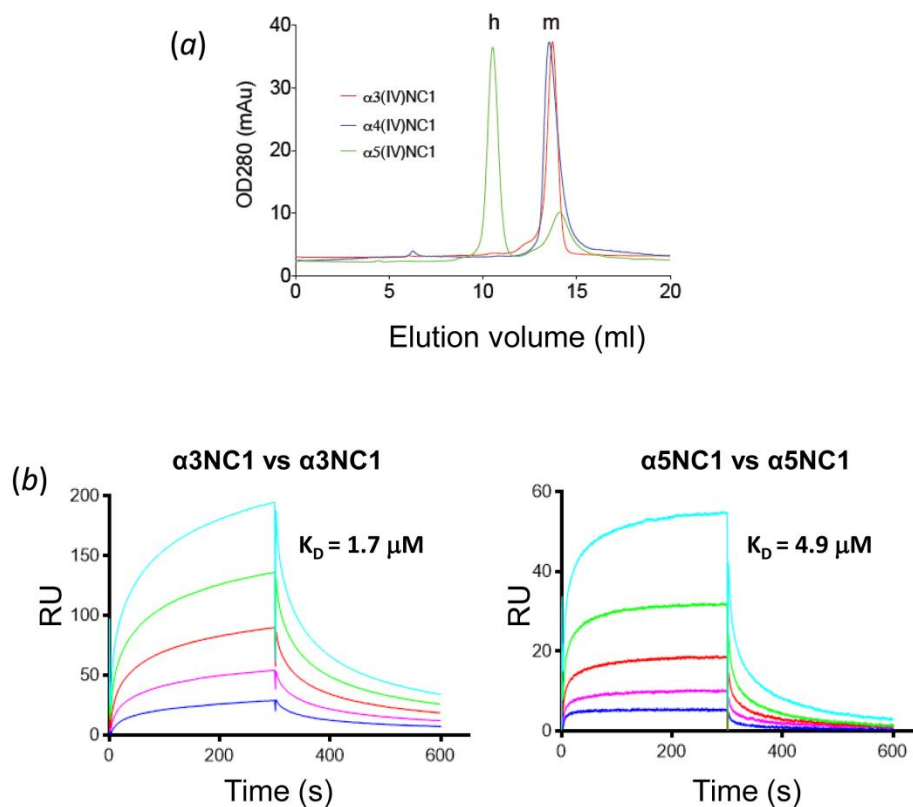

**Figure S2** *In vitro* evidence of self-association capacity of  $\alpha 3NC1$  and  $\alpha 5NC1$ . (a) Gel filtration chromatography of  $\alpha 3NC1$ ,  $\alpha 4NC1$  and  $\alpha 5NC1$ . "h" and "m" stand for hexamer and monomer, respectively. (b) Surface Plasmon Resonance assays.  $\alpha 3NC1$  (left) or  $\alpha 5NC1$  (right) covalently bound to the sensorchip were used in these assays; the ligands were the  $\alpha 3NC1$  (left) or  $\alpha 5NC1$  (right) chains in solution at concentrations (profiles from bottom to top) of 0.25, 0.5, 1, 2 and 4  $\mu M$ . The figure depicts examples of sensorchip traces after subtraction of blanks obtained simultaneously with protein-free solutions.  $K_D$  values were estimated from the obtained signal level, (average of two assays at least). For further details, see Materials and Methods.

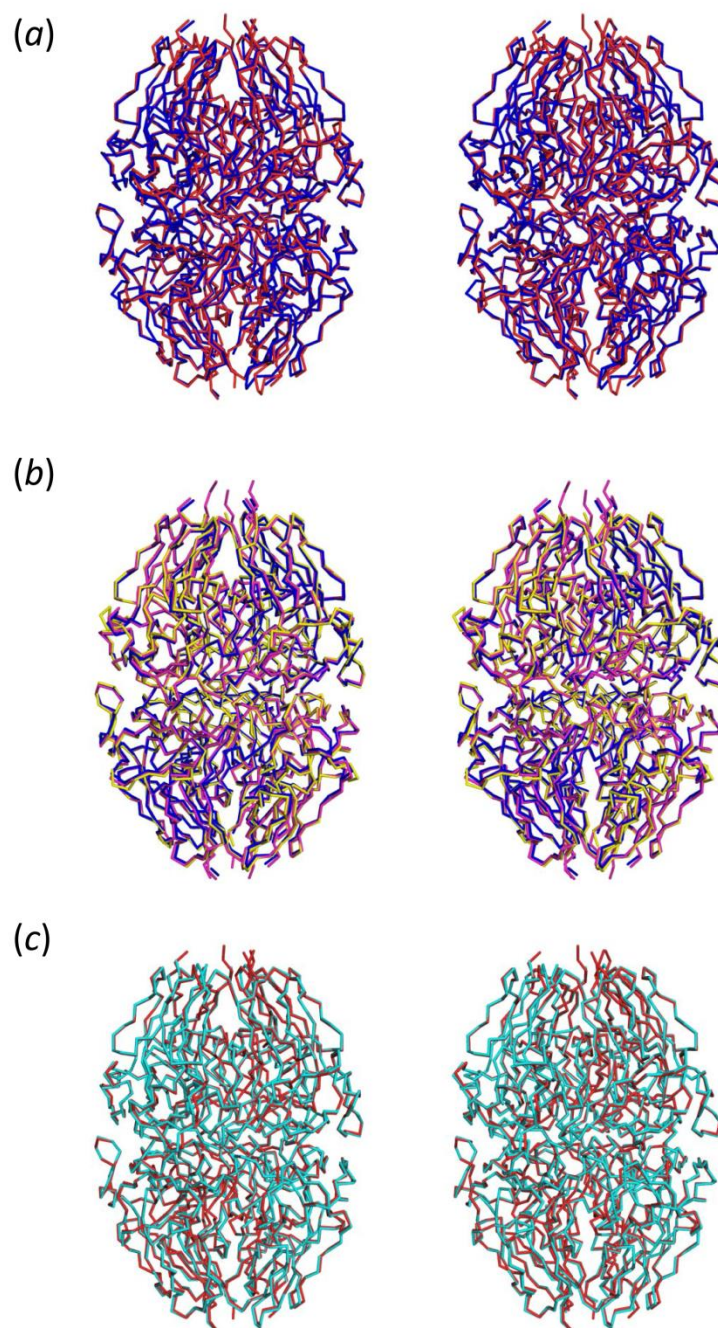

**Figure S3** Stereo views of the superimpositions of the backbone of NC1 structures. (a)  $\alpha 121\text{NC1}$  hexamer obtained from human placenta (PDB file 1LI1) (red) superimposed over  $\alpha 5\text{NC1}_{\text{homo}}$ . (b)  $\alpha 1\text{NC1}_{\text{homo}}$  (magenta),  $\alpha 3\text{NC1}_{\text{homo}}$  (yellow) and  $\alpha 5\text{NC1}_{\text{homo}}$  (blue) hexamers. (c)  $\alpha 121\text{NC1}$  hexamers obtained from placenta (red) or produced by recombinant techniques in this study (cyan).



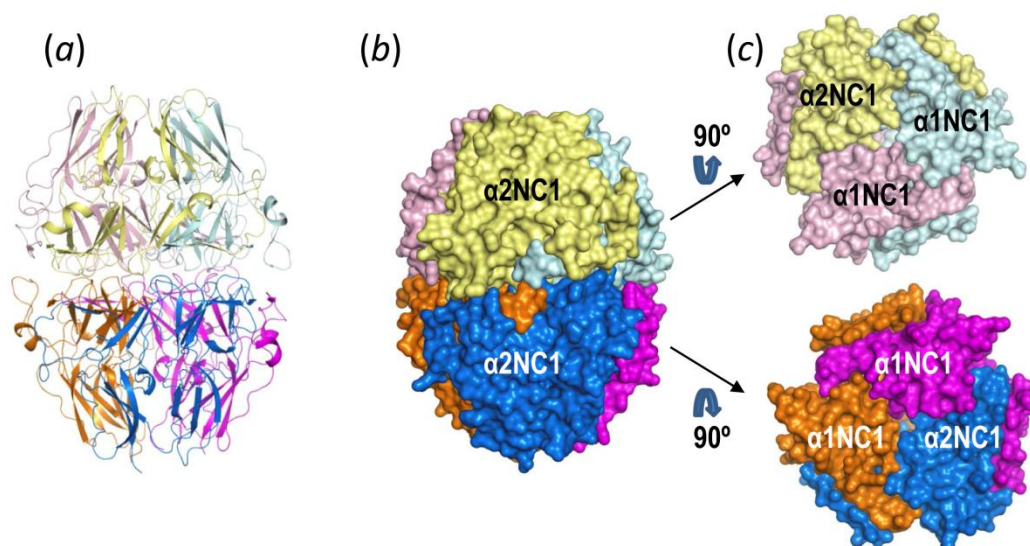

**Figure S4** Structure of recombinant  $\alpha 121\text{NC1}$  found in the asymmetric unit of its crystal: (a) cartoon representation or (b) surface representation, with each subunit showed with a different colour. In (c) the hexamer is deconstructed in its two protomers, viewed from their equatorial surfaces through which both trimers interact.

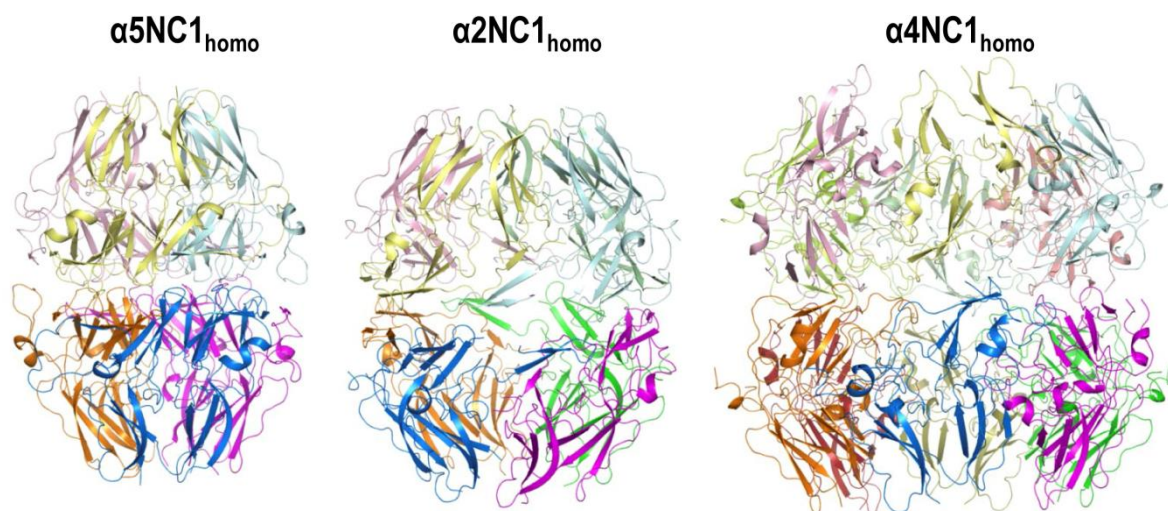

**Figure S5**

Cartoon representation of the oligomer quaternary structures for the indicated NC1 domains.



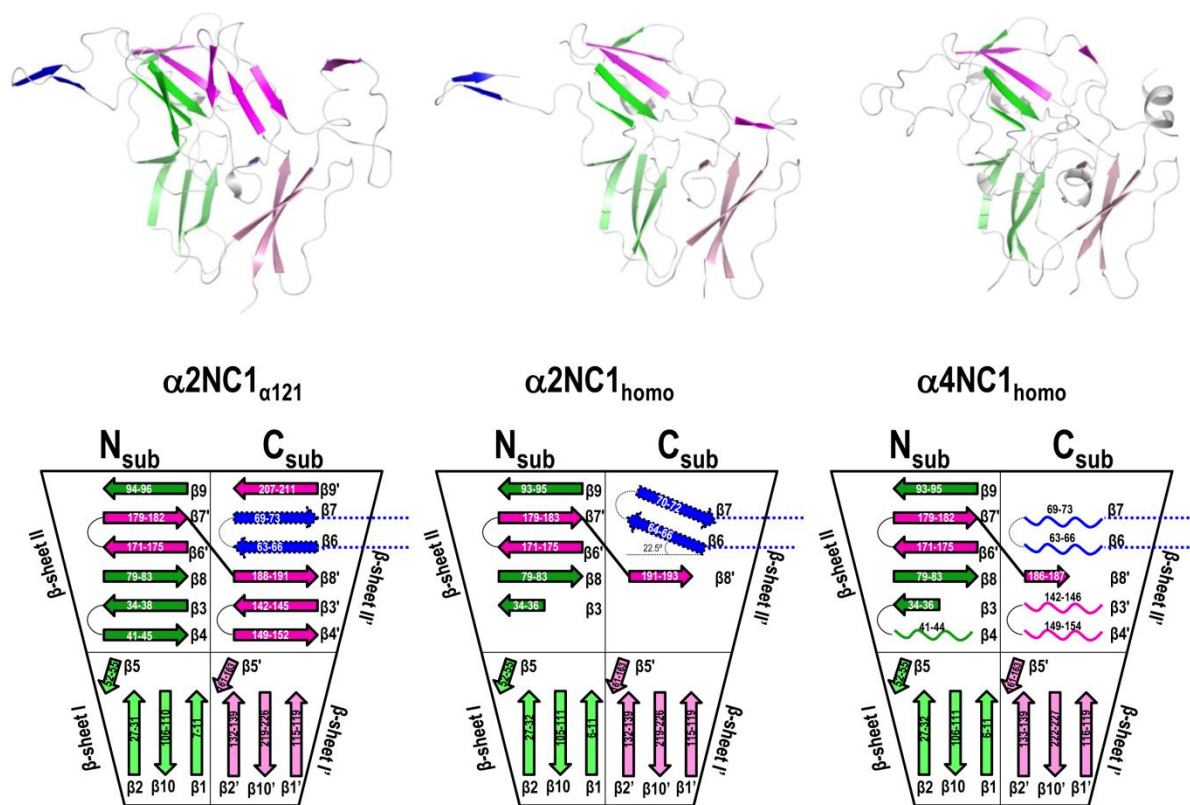

**Figure S6** Cartoon representation of the  $\alpha 2\text{NC1}$  subunit in the  $\alpha 121\text{NC1}$  hexamer ( $\alpha 2\text{NC1}_{\alpha 121}$ ) and the  $\alpha 2\text{NC1}$  and  $\alpha 4\text{NC1}$  domains in the corresponding crystalline homo-oligomers. Below, schemes of the corresponding folds can be seen with the same colour code as in the cartoon representations and labelling of  $\beta$  strands as in Fig 1.

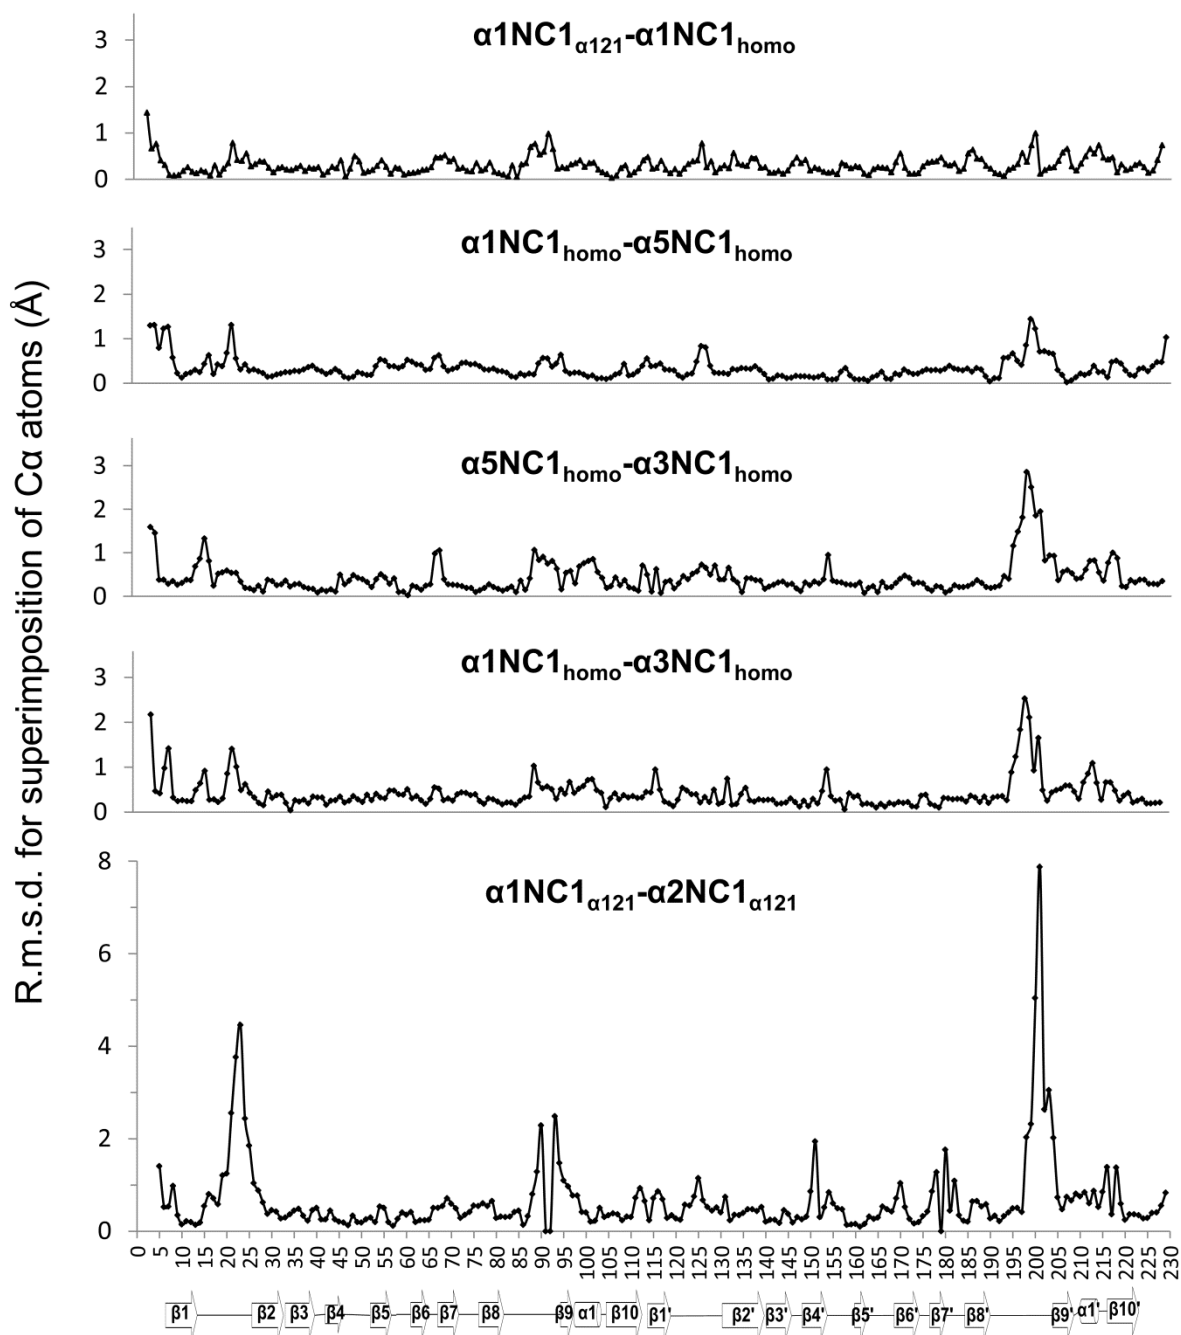

**Figure S7** RMSD value for each Ca atom after superposition of the  $\alpha$ NC1 chains. The residue number and secondary structure of the chains are shown in the X-axis at the bottom.

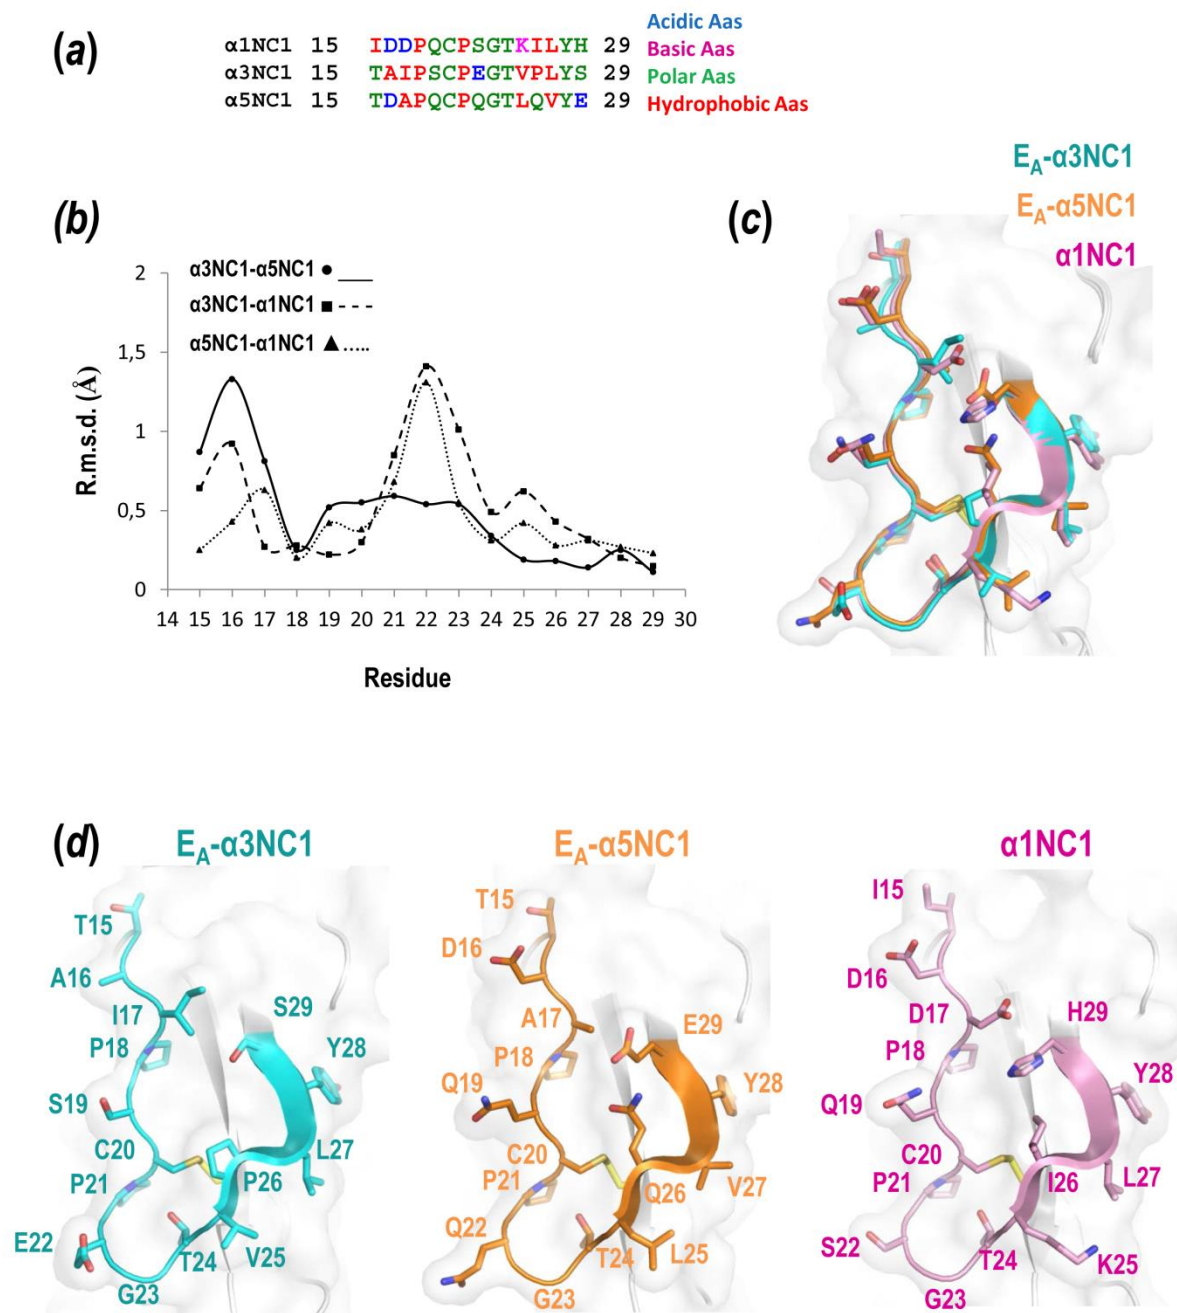

**Figure S8** The Goodpasture's  $E_A$  epitope. (a) Sequence alignment of  $\alpha 3\text{NC1}$  and  $\alpha 5\text{NC1}$  (residues 15-29 of the present structures)  $E_A$  epitopes with the corresponding residues of  $\alpha 1\text{NC1}$  (b) the RMSD values for the superimpositions of the structures corresponding to the sequences aligned in (a) (all from NC1 domains in homo-hexamers). (c) and (d) Cartoon representation of the structural superposition and their individual structures, respectively.

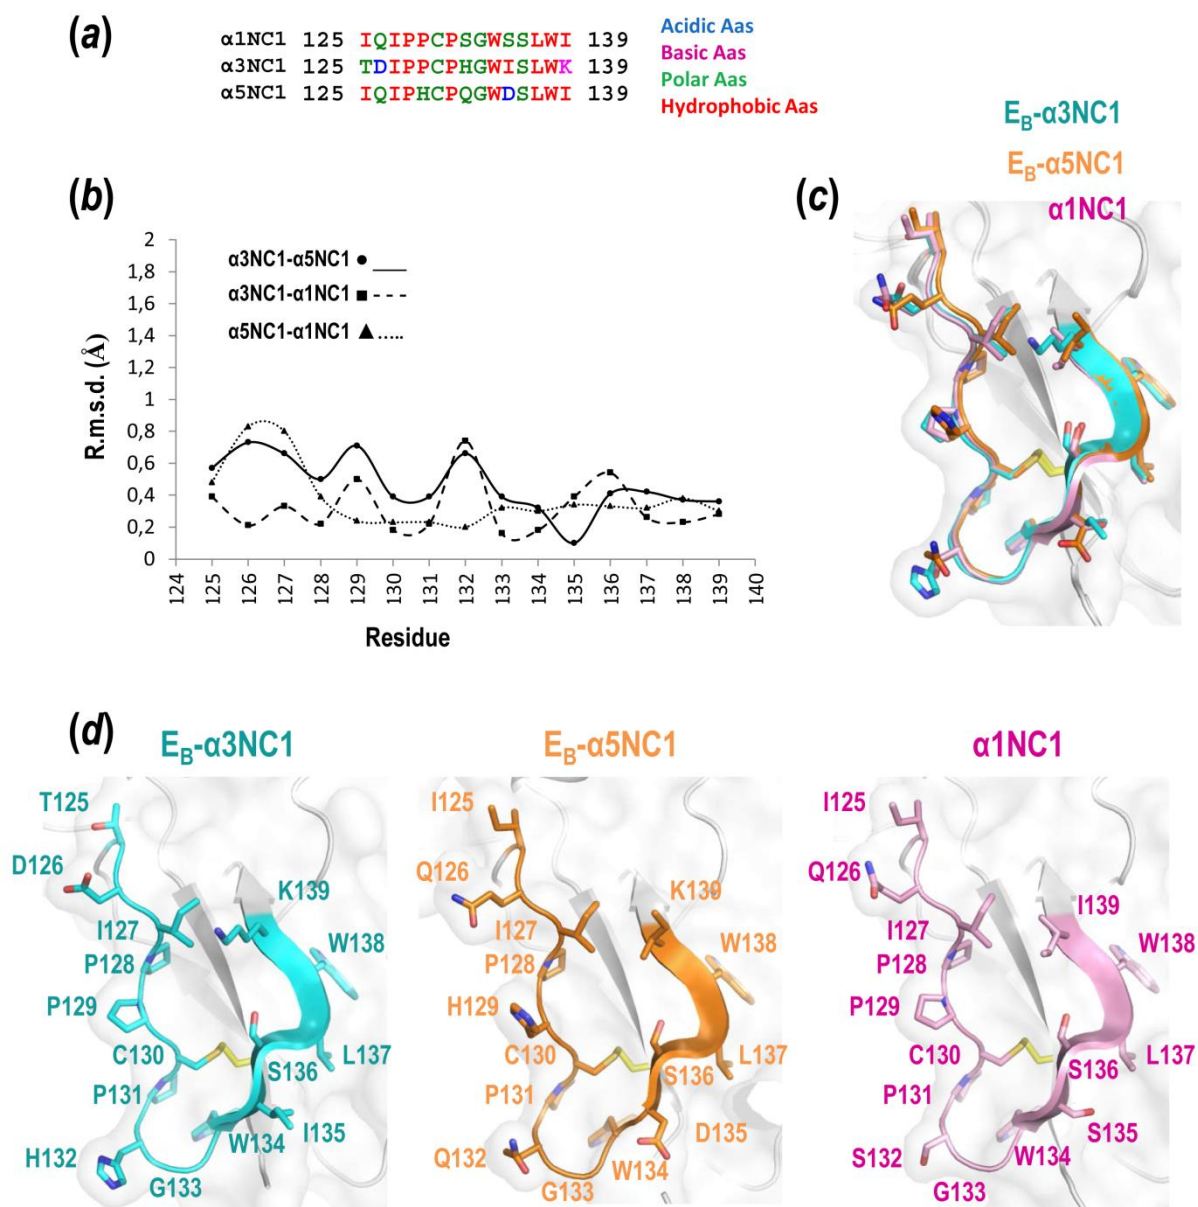

**Figure S9** The Goodpasture's  $E_B$  epitope. (a) Sequence alignment of  $\alpha$ 3NC1 and  $\alpha$ 5NC1 (residues 125-139 of the present structures)  $E_B$  epitopes, with the corresponding residues of  $\alpha$ 1NC1 the RMSD values for the superimpositions of the structures corresponding to the sequences aligned in a (all from NC1 domains in homohexamers). (c) and (d) Cartoon representation of the structural superposition and their individual structures, respectively.

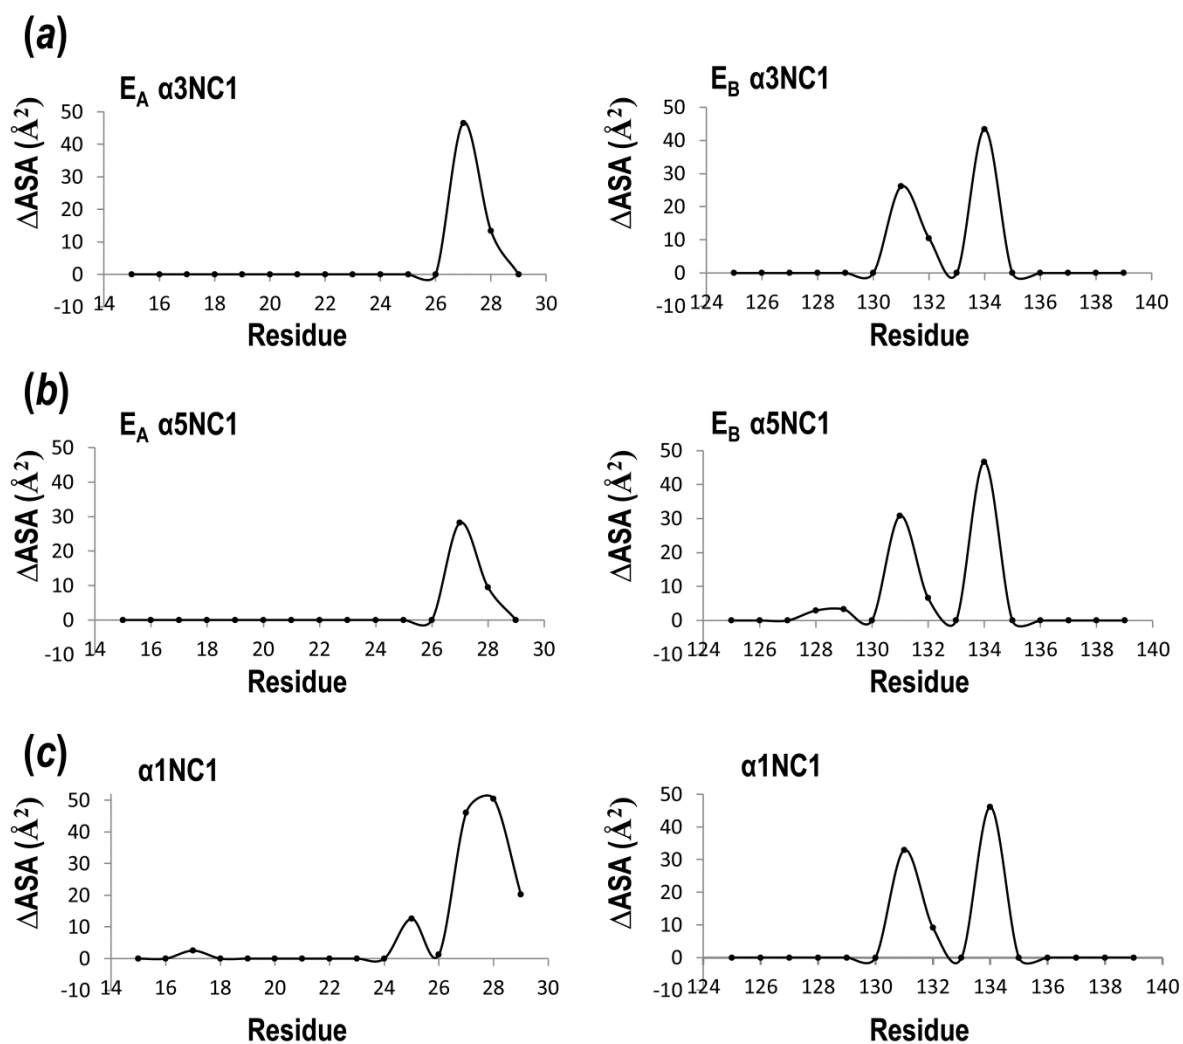

**Figure S10** Accessible surface area difference between monomer and homohexamer ( $\Delta$ ASA) for the E<sub>A</sub> (left) and E<sub>B</sub> (right) epitopes of (a)  $\alpha$ 3NC1 and (b)  $\alpha$ 5NC1 and, for comparison, the corresponding region (c) of  $\alpha$ 1NC1.

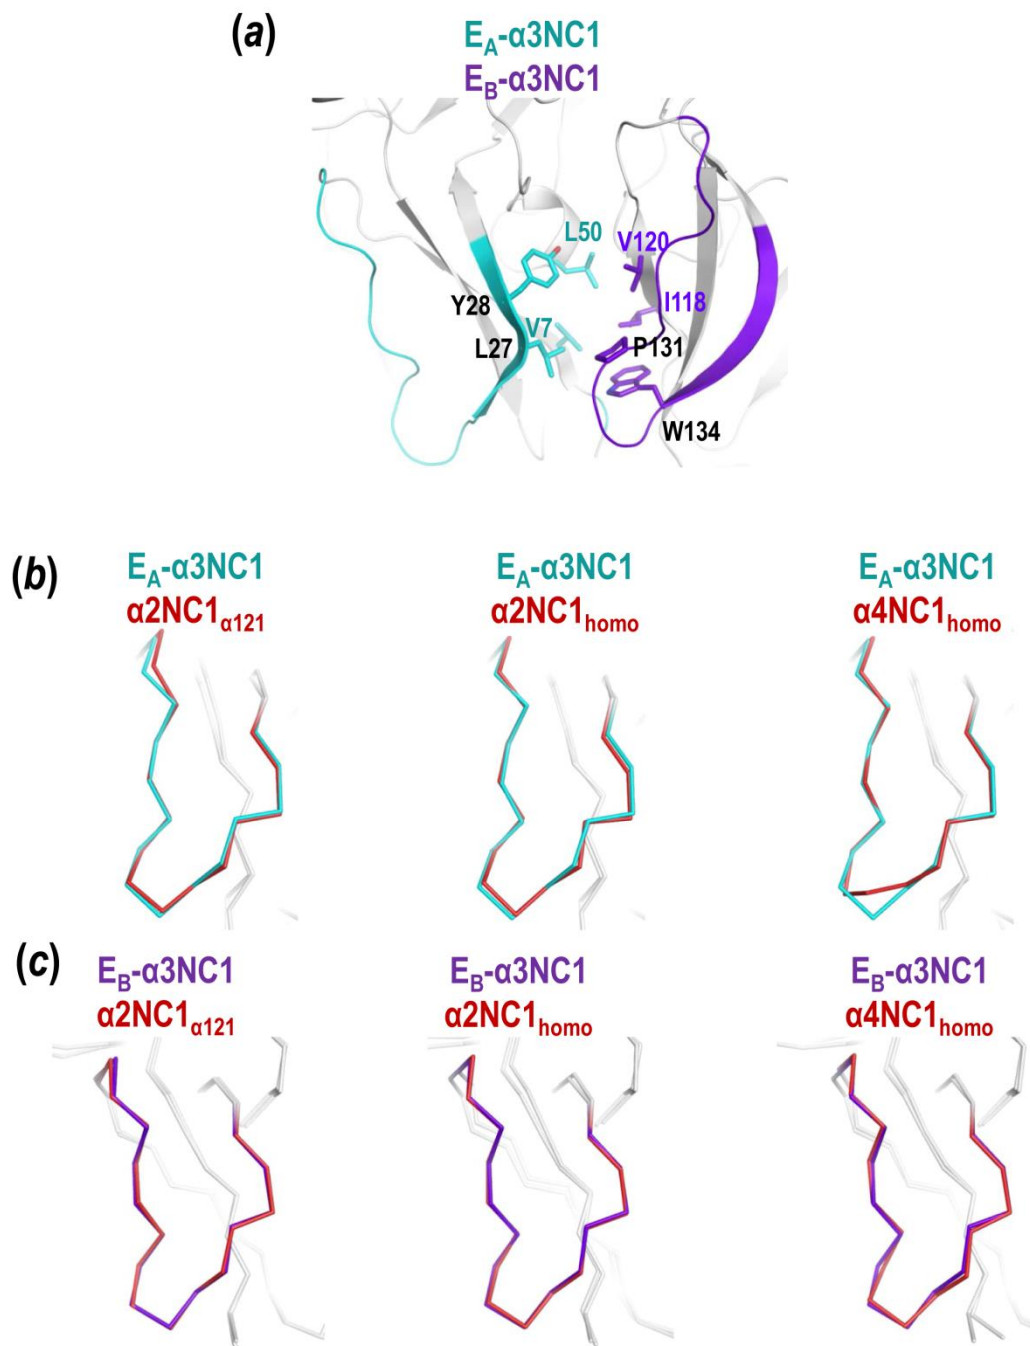

**Figure S11** Hydrophobic patch gluing of  $E_A$  and  $E_B$  epitopes in the  $\alpha 3NC1$  domain structure (a), and illustration of high structural similarity of the two epitopes of  $\alpha 3NC1$  with the corresponding non-autoimmunogenic regions of  $\alpha 2NC1_{\alpha 121}$ ,  $\alpha 2NC1_{\text{homo}}$  and  $\alpha 4NC1_{\text{homo}}$  (b, c).
